# Supplementary material for: Estimation of Hail Damage Using Crop Models and Remote Sensing
Source: MDPI journal article supplement (doi:10.3390/rs13142655), 2021-07-06
Supplement: s1 [file s1]

## Supplementary materials

### Table:

**Table S1.** Soil texture (USDA), TKN, SOC and pH values for all study fields.

| Field ID | Depth [m] | Clay [%] | Silt [%] | Sand [%] | pH   | SOC [%] | TKN [%] |
|----------|-----------|----------|----------|----------|------|---------|---------|
| Field 1  | 0-0.5     | 44.9     | 45.2     | 9.9      | 8.12 | 1.35    | 0.17    |
| Field 1  | 0.5-0.8   | 55.6     | 41.4     | 3.0      | 8.27 | 0.86    | 0.12    |
| Field 2  | 0-0.5     | 19.8     | 52.0     | 28.2     | 7.89 | 0.95    | 0.11    |
| Field 2  | 0.5-0.8   | 22.6     | 50.2     | 27.2     | 8.20 | 0.59    | 0.07    |
| Field 3  | 0-0.5     | 36.4     | 50.6     | 13.0     | 8.00 | 1.29    | 0.16    |
| Field 3  | 0.5-0.8   | 36.0     | 53.4     | 10.6     | 8.35 | 0.88    | 0.11    |
| Field 4  | 0-0.5     | 26.1     | 60.0     | 13.9     | 7.99 | 0.88    | 0.12    |
| Field 4  | 0.5-0.8   | 26.1     | 60.9     | 13.0     | 8.09 | 0.80    | 0.10    |
| Field 5  | 0-0.5     | 18.8     | 46.7     | 34.5     | 8.00 | 0.76    | 0.08    |
| Field 5  | 0.5-0.8   | 18.0     | 40.7     | 41.3     | 8.02 | 0.75    | 0.08    |
| Field 6  | 0-0.5     | 35.1     | 56.8     | 8.1      | 8.00 | 1.29    | 0.16    |
| Field 6  | 0.5-0.8   | 33.4     | 55.9     | 10.7     | 8.25 | 0.84    | 0.11    |
| Field 7  | 0-0.5     | 36.1     | 50.8     | 13.1     | 7.99 | 1.80    | 0.20    |
| Field 7  | 0.5-0.8   | 33.9     | 50.0     | 16.1     | 8.18 | 1.02    | 0.12    |
| Field 8  | 0-0.5     | 19.9     | 57.9     | 22.2     | 7.70 | 1.26    | 0.12    |
| Field 8  | 0.5-0.8   | 18.1     | 56.9     | 25.0     | 8.00 | 1.15    | 0.10    |

**Figures:**

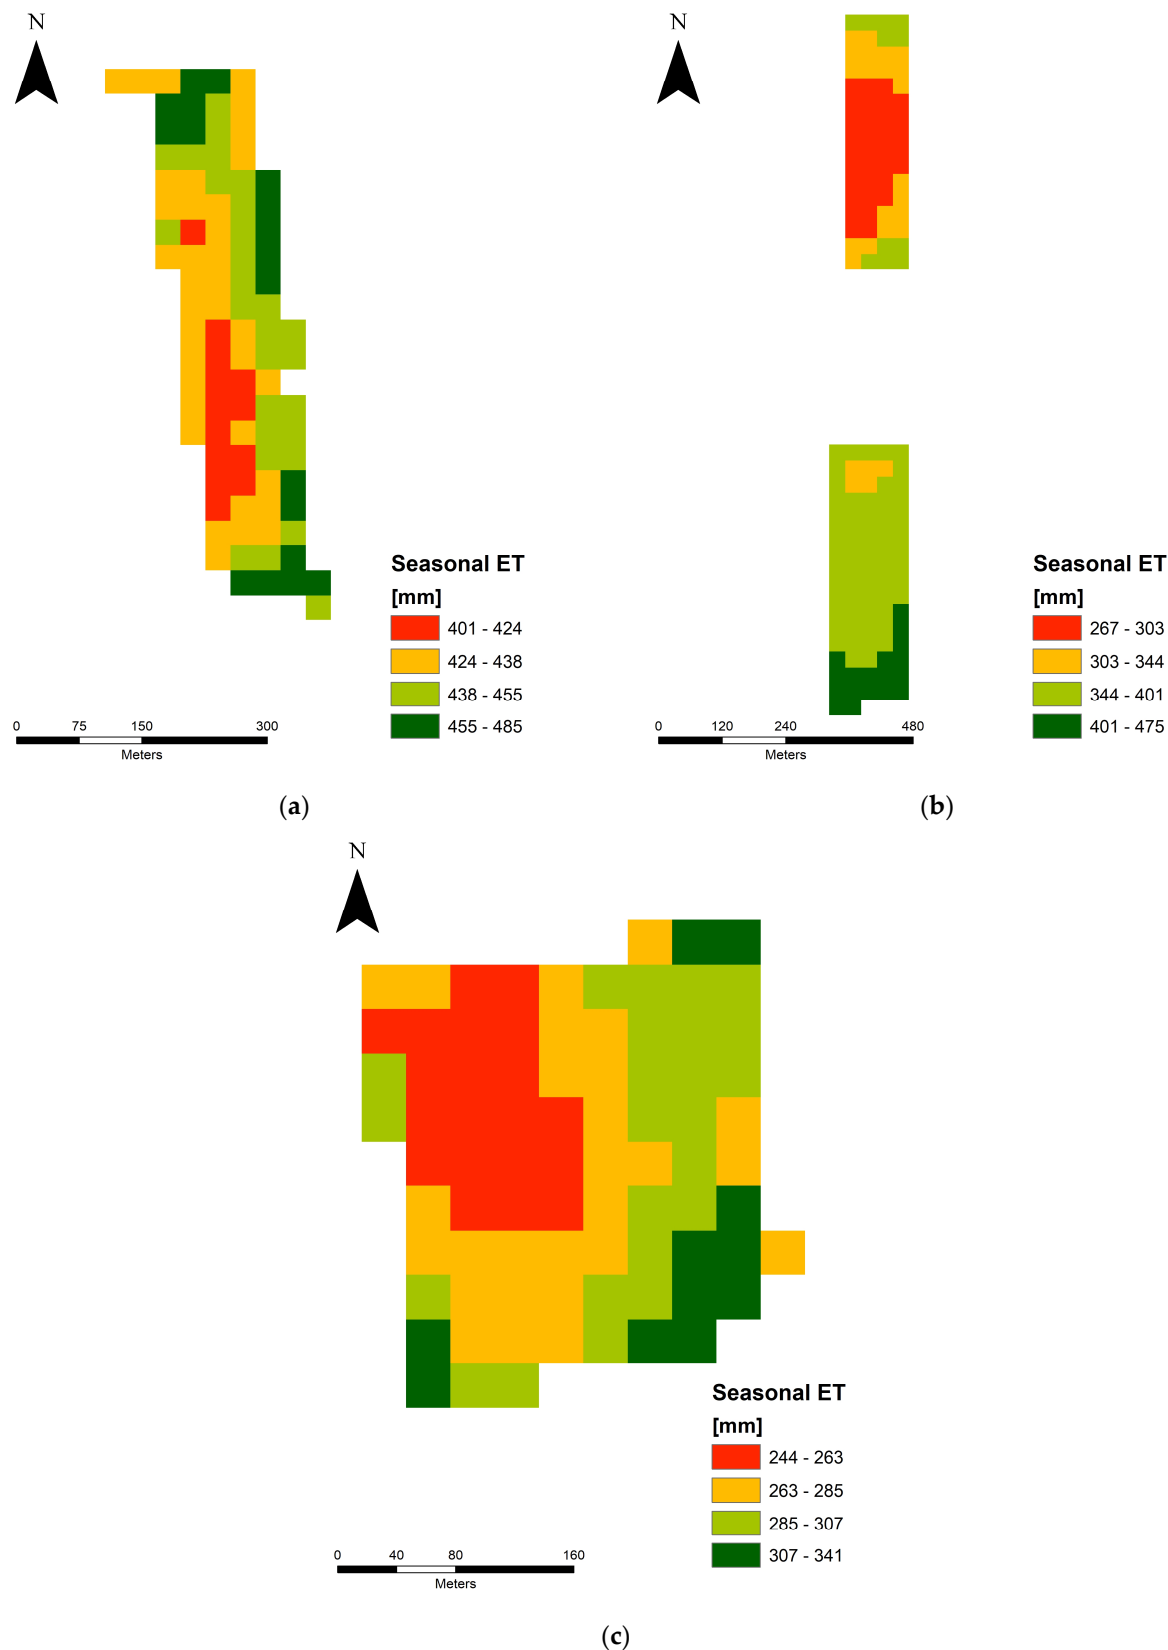

**Figure S1.** SEBAL seasonal ET maps generated for Field 2 (a), Field 3 (b) and Field 4 (c).

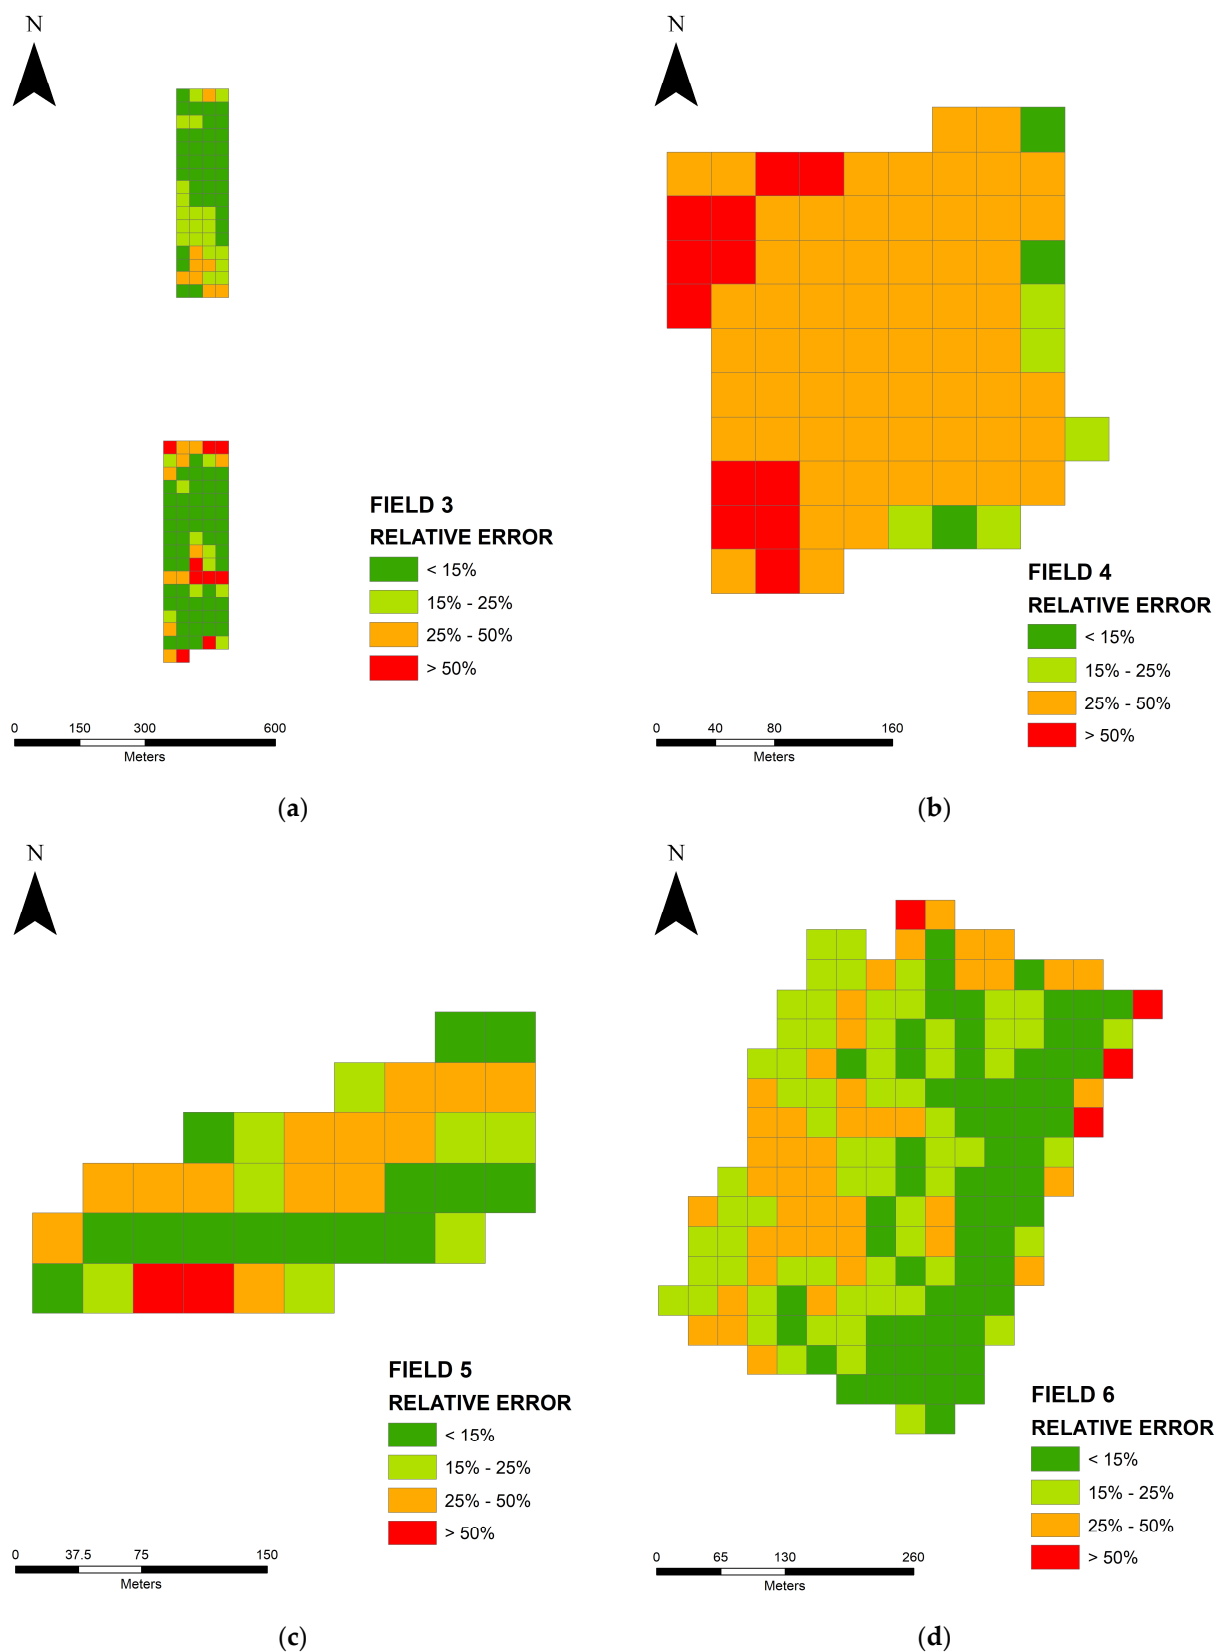

**Figure S2.** Relative error maps generated for Field 3 (a), Field 4 (b), Field 5 (c), and Field 6 (d) between measured and SEBAL-estimated yields.
